# Supplementary material for: Highly Purified Eicosapentaenoic Acid Alleviates the Inflammatory Response and Oxidative Stress in Macrophages during Atherosclerosis via the miR‐1a‐3p/sFRP1/Wnt/PCP‐JNK Pathway
Source: Hindawi journal article supplement (doi:10.1155/2022/9451058), 2022-01-01

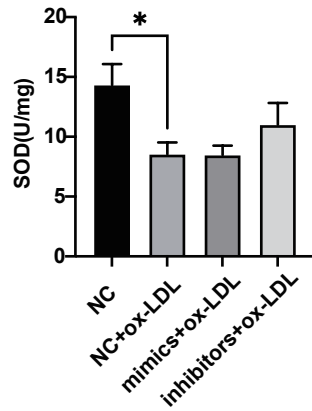

Supplement: f2 [file 9451058.f2.pdf]
